# Supplementary material for: Offspring genetic diversity regulates rearing experiences that predict differential susceptibility to Chd8 haploinsufficiency
Source: Research Square preprint supplement (doi:10.21203/rs.3.rs-6058389/v1), 2025-03-03
Supplement: Supplementary file 1 [file 1e297276ce6e7846c0e917fb.xlsx]

## Sheet: pup posthoc tests PNW 3
Behavior	Strain 1	Strain 2	N Strain 1	Mean Strain 1	SD Strain 1	N Strain 2	Mean Strain 2	SD Strain 2	Cohen's D	df	Bonferroni corrected p value
Age at eye opening	B6-CC1	B6-CC13	11	17.82	1.079	7	15.29	1.113	2.31712	93	0.009
Age at eye opening	B6-CC1	B6-CC24	11	17.82	1.079	7	15	2.309	1.70769	93	0.033
Age at eye opening	B6-CC1	B6-CC75	11	17.82	1.079	7	14.43	1.718	2.5029	93	<.001
Age to first eat solid food	B6-CC10	B6-CC2	5	20.2	0.837	6	16.67	1.033	3.71231	84	0.046
Age to first eat solid food	B6-CC10	B6-CC25	5	20.2	0.837	5	16	2	2.73961	84	<.001
Age to first eat solid food	B6-CC10	B6-CC75	5	20.2	0.837	6	16.5	1.049	3.85187	84	0.002
Age to first eat solid food	B6-CC57	B6-CC25	6	19.33	1.862	5	16	2	1.73027	84	0.029
Age to first jump	B6-CC1	B6-CC28	6	18.67	1.366	5	13.6	2.966	2.2796	65	0.019
PNW 3 autogroom	B6-CC13	B6-B6	7	4.7314	4.24669	13	2.4	1.28062	0.874664	92	<.001
PNW 3 autogroom	B6-CC13	B6-CC1	7	4.7314	4.24669	13	2.3591	0.6844	0.943372	92	<.001
PNW 3 autogroom	B6-CC13	B6-CC12	7	4.7314	4.24669	9	1.6889	1.34949	1.0274	92	<.001
PNW 3 autogroom	B6-CC13	B6-CC2	7	4.7314	4.24669	6	2.845	0.96641	0.588883	92	0.04
PNW 3 autogroom	B6-CC13	B6-CC32	7	4.7314	4.24669	8	2.9387	0.8836	0.606252	92	0.016
PNW 3 autogroom	B6-CC24	B6-CC12	7	3.6143	1.63751	9	1.6889	1.34949	1.30112	92	0.038
PNW 3 autogroom	B6-CC25	B6-CC12	5	4.488	0.674	9	1.6889	1.34949	2.39536	92	0.004
PNW 3 climb	B6-CC25	B6-B6	5	1	0.82277	13	0.0192	0.06934	2.35914	92	<.001
PNW 3 climb	B6-CC25	B6-CC1	5	1	0.82277	11	0.2182	0.30271	1.53659	92	0.013
PNW 3 climb	B6-CC25	B6-CC10	5	1	0.82277	5	0	0	1.71884	92	0.004
PNW 3 climb	B6-CC25	B6-CC12	5	1	0.82277	9	0.1556	0.26034	1.62254	92	0.002
PNW 3 climb	B6-CC25	B6-CC13	5	1	0.82277	7	0.0857	0.22678	1.66474	92	0.009
PNW 3 climb	B6-CC25	B6-CC16	5	1	0.82277	4	0.05	0.1	1.51905	92	0.002
PNW 3 climb	B6-CC25	B6-CC2	5	1	0.82277	6	0.2417	0.31689	1.26975	92	0.022
PNW 3 climb	B6-CC25	B6-CC24	5	1	0.82277	7	0.2043	0.29348	1.40124	92	0.017
PNW 3 climb	B6-CC25	B6-CC32	5	1	0.82277	8	0.2788	0.27315	1.3309	92	0.027
PNW 3 climb	B6-CC44	B6-B6	5	0.96	0.77618	13	0.0192	0.06934	2.39567	92	<.001
PNW 3 climb	B6-CC44	B6-CC1	5	0.96	0.77618	11	0.2182	0.30271	1.52188	92	0.024
PNW 3 climb	B6-CC44	B6-CC10	5	0.96	0.77618	5	0	0	1.74914	92	0.007
PNW 3 climb	B6-CC44	B6-CC12	5	0.96	0.77618	9	0.1556	0.26034	1.62182	92	0.005
PNW 3 climb	B6-CC44	B6-CC13	5	0.96	0.77618	7	0.0857	0.22678	1.67689	92	0.016
PNW 3 climb	B6-CC44	B6-CC16	5	0.96	0.77618	4	0.05	0.1	1.54139	92	0.004
PNW 3 climb	B6-CC44	B6-CC2	5	0.96	0.77618	6	0.2417	0.31689	1.26281	92	0.041
PNW 3 climb	B6-CC44	B6-CC24	5	0.96	0.77618	7	0.2043	0.29348	1.39691	92	0.03
PNW 3 crawl/run	B6-CC25	B6-B6	5	2.788	2.01823	13	0.8923	0.66547	1.63129	92	<.001
PNW 3 crawl/run	B6-CC25	B6-CC1	5	2.788	2.01823	11	1.4	1.06958	0.986177	92	0.037
PNW 3 crawl/run	B6-CC25	B6-CC10	5	2.788	2.01823	5	1	0.67823	1.18762	92	0.005
PNW 3 crawl/run	B6-CC25	B6-CC12	5	2.788	2.01823	9	0.8889	0.56667	1.51477	92	<.001
PNW 3 crawl/run	B6-CC25	B6-CC13	5	2.788	2.01823	7	0.73	0.62048	1.50888	92	0.004
PNW 3 crawl/run	B6-CC25	B6-CC16	5	2.788	2.01823	4	0.2925	0.26247	1.62543	92	<.001
PNW 3 crawl/run	B6-CC25	B6-CC2	5	2.788	2.01823	6	1.155	0.92518	1.08009	92	0.02
PNW 3 crawl/run	B6-CC25	B6-CC24	5	2.788	2.01823	7	1.12	0.73451	1.19356	92	0.009
PNW 3 crawl/run	B6-CC25	B6-CC57	5	2.788	2.01823	6	0.6283	0.34931	1.57591	92	<.001
PNW 3 crawl/run	B6-CC25	B6-CC7	5	2.788	2.01823	5	0.874	0.60612	1.2845	92	0.003
PNW 3 dig	B6-CC32	B6-B6	8	1.2438	0.23603	13	0.2615	0.37758	2.95414	92	0.01
PNW 3 dig	B6-CC32	B6-CC12	8	1.2438	0.23603	9	0.3111	0.52068	2.25822	92	0.032
PNW 3 eat solid food	B6-CC44	B6-B6	5	2.4	0.92707	13	0.7462	0.57426	2.4326	92	0.047
PNW 3 jump	B6-CC13	B6-B6	7	0.79	0.59724	13	0.1538	0.23758	1.60804	92	0.005
PNW 3 jump	B6-CC13	B6-CC1	7	0.79	0.59724	11	0.2	0.25298	1.41539	92	0.015
PNW 3 jump	B6-CC13	B6-CC10	7	0.79	0.59724	5	0	0	1.70766	92	0.008
PNW 3 jump	B6-CC13	B6-CC12	7	0.79	0.59724	9	0.1111	0.10541	1.70141	92	0.003
PNW 3 jump	B6-CC24	B6-CC12	7	0.7514	0.55457	9	0.1111	0.10541	1.72266	92	0.037
PNW 3 jump	B6-CC25	B6-B6	5	1.08	0.84422	13	0.1538	0.23758	1.97238	92	0.001
PNW 3 jump	B6-CC25	B6-CC1	5	1.08	0.84422	11	0.2	0.25298	1.76231	92	0.004
PNW 3 jump	B6-CC25	B6-CC10	5	1.08	0.84422	5	0	0	1.80919	92	0.002
PNW 3 jump	B6-CC25	B6-CC12	5	1.08	0.84422	9	0.1111	0.10541	1.95757	92	<.001
PNW 3 jump	B6-CC25	B6-CC16	5	1.08	0.84422	4	0.1925	0.16399	1.37142	92	0.044
PNW 3 jump	B6-CC28	B6-B6	6	1.0033	0.65899	13	0.1538	0.23758	2.07523	92	<.001
PNW 3 jump	B6-CC28	B6-CC1	6	1.0033	0.65899	11	0.2	0.25298	1.85553	92	0.002
PNW 3 jump	B6-CC28	B6-CC10	6	1.0033	0.65899	5	0	0	2.04262	92	<.001
PNW 3 jump	B6-CC28	B6-CC12	6	1.0033	0.65899	9	0.1111	0.10541	2.13972	92	<.001
PNW 3 jump	B6-CC28	B6-CC16	6	1.0033	0.65899	4	0.1925	0.16399	1.52817	92	0.027
PNW 3 jump	B6-CC44	B6-B6	5	1.238	0.85345	13	0.1538	0.23758	2.28861	92	<.001
PNW 3 jump	B6-CC44	B6-CC1	5	1.238	0.85345	11	0.2	0.25298	2.06031	92	<.001
PNW 3 jump	B6-CC44	B6-CC10	5	1.238	0.85345	5	0	0	2.05143	92	<.001
PNW 3 jump	B6-CC44	B6-CC12	5	1.238	0.85345	9	0.1111	0.10541	2.2529	92	<.001
PNW 3 jump	B6-CC44	B6-CC16	5	1.238	0.85345	4	0.1925	0.16399	1.59858	92	0.004
PNW 3 jump	B6-CC75	B6-B6	7	0.7686	0.60916	13	0.1538	0.23758	1.53069	92	0.006
PNW 3 jump	B6-CC75	B6-CC1	7	0.7686	0.60916	11	0.2	0.25298	1.34337	92	0.022
PNW 3 jump	B6-CC75	B6-CC10	7	0.7686	0.60916	5	0	0	1.6289	92	0.008
PNW 3 jump	B6-CC75	B6-CC12	7	0.7686	0.60916	9	0.1111	0.10541	1.61678	92	0.003
PNW 3 lick & groom	B6-CC13	B6-B6	7	0.6643	0.7801	13	0.0462	0.08771	1.35534	92	0.002
PNW 3 lick & groom	B6-CC13	B6-CC1	7	0.6643	0.7801	11	0.0182	0.0603	1.3458	92	<.001
PNW 3 lick & groom	B6-CC13	B6-CC12	7	0.6643	0.7801	9	0.1556	0.26034	0.929469	92	0.005
PNW 3 lick & groom	B6-CC24	B6-B6	7	1.1143	0.63358	13	0.0462	0.08771	2.86552	92	<.001
PNW 3 lick & groom	B6-CC24	B6-CC1	7	1.1143	0.63358	11	0.0182	0.0603	2.80401	92	<.001
PNW 3 lick & groom	B6-CC24	B6-CC10	7	1.1143	0.63358	5	0.28	0.17889	1.65654	92	0.006
PNW 3 lick & groom	B6-CC24	B6-CC12	7	1.1143	0.63358	9	0.1556	0.26034	2.08824	92	<.001
PNW 3 lick & groom	B6-CC24	B6-CC22	7	1.1143	0.63358	4	0.2925	0.34481	1.48259	92	0.004
PNW 3 lick & groom	B6-CC25	B6-B6	5	1.45	0.33083	13	0.0462	0.08771	7.71227	92	<.001
PNW 3 lick & groom	B6-CC25	B6-CC1	5	1.45	0.33083	11	0.0182	0.0603	7.78012	92	<.001
PNW 3 lick & groom	B6-CC25	B6-CC10	5	1.45	0.33083	5	0.28	0.17889	4.39946	92	<.001
PNW 3 lick & groom	B6-CC25	B6-CC12	5	1.45	0.33083	9	0.1556	0.26034	4.52944	92	<.001
PNW 3 lick & groom	B6-CC25	B6-CC16	5	1.45	0.33083	4	0.5925	0.49487	2.09522	92	0.012
PNW 3 lick & groom	B6-CC25	B6-CC2	5	1.45	0.33083	6	0.73	0.51459	1.62733	92	0.023
PNW 3 lick & groom	B6-CC25	B6-CC22	5	1.45	0.33083	4	0.2925	0.34481	3.43581	92	<.001
PNW 3 lick & groom	B6-CC25	B6-CC32	5	1.45	0.33083	8	0.6813	0.37081	2.15449	92	0.011
PNW 3 lick & groom	B6-CC25	B6-CC7	5	1.45	0.33083	5	0.554	0.36549	2.57035	92	0.003
PNW 3 lick & groom	B6-CC28	B6-CC1	6	0.73	0.50478	11	0.0182	0.0603	2.40827	92	0.033
PNW 3 lick & groom	B6-CC32	B6-CC1	8	0.6813	0.37081	11	0.0182	0.0603	2.73559	92	0.039
PNW 3 lick & groom	B6-CC44	B6-B6	5	1.014	0.70458	13	0.0462	0.08771	2.68545	92	<.001
PNW 3 lick & groom	B6-CC44	B6-CC1	5	1.014	0.70458	11	0.0182	0.0603	2.62021	92	<.001
PNW 3 lick & groom	B6-CC44	B6-CC12	5	1.014	0.70458	9	0.1556	0.26034	1.87024	92	0.002
PNW 3 lick & groom	B6-CC57	B6-B6	6	0.7783	0.18659	13	0.0462	0.08771	5.84832	92	0.009
PNW 3 lick & groom	B6-CC57	B6-CC1	6	0.7783	0.18659	11	0.0182	0.0603	6.4173	92	0.005
PNW 3 lick & groom	B6-CC57	B6-CC12	6	0.7783	0.18659	9	0.1556	0.26034	2.6528	92	0.021
PNW 3 lick & groom	B6-CC75	B6-B6	7	1.0114	0.71769	13	0.0462	0.08771	2.29535	92	<.001
PNW 3 lick & groom	B6-CC75	B6-CC1	7	1.0114	0.71769	11	0.0182	0.0603	2.2467	92	<.001
PNW 3 lick & groom	B6-CC75	B6-CC10	7	1.0114	0.71769	5	0.28	0.17889	1.28923	92	0.012
PNW 3 lick & groom	B6-CC75	B6-CC12	7	1.0114	0.71769	9	0.1556	0.26034	1.68005	92	<.001
PNW 3 lick & groom	B6-CC75	B6-CC22	7	1.0114	0.71769	4	0.2925	0.34481	1.16161	92	0.008
PNW 3 nest build	B6-CC13	B6-B6	7	0.5343	0.73253	13	0.0538	0.103	1.11431	92	0.021
PNW 3 nest build	B6-CC25	B6-B6	5	0.77	0.88963	13	0.0538	0.103	1.57868	92	0.022
PNW 3 nest build	B6-CC25	B6-CC16	5	0.77	0.88963	4	0.0425	0.085	1.0781	92	0.036
PNW 3 nest eating	B6-CC25	B6-B6	5	1.914	1.27592	13	0.3769	0.18665	2.33559	92	<.001
PNW 3 nest eating	B6-CC25	B6-CC1	5	1.914	1.27592	11	0.2773	0.20416	2.32652	92	<.001
PNW 3 nest eating	B6-CC25	B6-CC10	5	1.914	1.27592	5	0.44	0.38471	1.56421	92	<.001
PNW 3 nest eating	B6-CC25	B6-CC12	5	1.914	1.27592	9	0.2	0.28284	2.2202	92	<.001
PNW 3 nest eating	B6-CC25	B6-CC13	5	1.914	1.27592	7	0.5543	0.65711	1.42515	92	0.02
PNW 3 nest eating	B6-CC25	B6-CC16	5	1.914	1.27592	4	0.225	0.263	1.72391	92	<.001
PNW 3 nest eating	B6-CC25	B6-CC2	5	1.914	1.27592	6	0.7233	0.48653	1.28768	92	0.009
PNW 3 nest eating	B6-CC25	B6-CC24	5	1.914	1.27592	7	0.7714	0.4855	1.2834	92	0.022
PNW 3 nest eating	B6-CC25	B6-CC28	5	1.914	1.27592	6	0.57	0.34117	1.51384	92	0.002
PNW 3 nest eating	B6-CC25	B6-CC32	5	1.914	1.27592	8	0.8313	0.96434	0.995115	92	0.006
PNW 3 nest eating	B6-CC25	B6-CC44	5	1.914	1.27592	5	0.674	0.55797	1.25926	92	0.004
PNW 3 nest eating	B6-CC25	B6-CC57	5	1.914	1.27592	6	0.4283	0.29936	1.68946	92	<.001
PNW 3 nest eating	B6-CC25	B6-CC7	5	1.914	1.27592	5	0.434	0.43793	1.55157	92	<.001
PNW 3 nest eating	B6-CC75	B6-B6	7	0.9857	0.81613	13	0.3769	0.18665	1.22934	92	0.018
PNW 3 nest eating	B6-CC75	B6-CC1	7	0.9857	0.81613	11	0.2773	0.20416	1.34884	92	0.011
PNW 3 nest eating	B6-CC75	B6-CC12	7	0.9857	0.81613	9	0.2	0.28284	1.36531	92	<.001
PNW 3 nest eating	B6-CC75	B6-CC16	7	0.9857	0.81613	4	0.225	0.263	1.11303	92	0.025
