# Supplementary material for: Offspring genetic diversity regulates rearing experiences that predict differential susceptibility to Chd8 haploinsufficiency
Source: Research Square preprint supplement (doi:10.21203/rs.3.rs-6058389/v1), 2025-03-03
Supplement: Supplementary file 2 [file a2af30d9cfe0a0e24f3d1914.xlsx]

## Sheet: dam posthoc tests
Behavior	Age	Strain 1	Strain 2	N Strain 1	Mean Strain 1	SD Strain 1	N Strain 2	Mean Strain 2	SD Strain 2	Cohen's D	df	Bonferroni corrected p-value
Eating	P1-21	B6-CC1	B6-CC12	13	1.62111	0.965229	12	0.93349	0.650386	0.828763	99	0.033
Eating	P1-21	B6-CC75	B6-CC12	7	1.56489	0.796019	12	0.93349	0.650386	0.895307	99	0.018
Licking and grooming	P1-21	B6-CC75	B6-CC1	7	1.25777	0.329263	13	0.745522	0.356808	1.47254	99	0.033
Nest quality	P1-21	B6-CC22	B6-B6	5	3.39228	0.256118	11	2.73644	0.314023	2.1962	90	0.024
Nest quality	P1-21	B6-CC22	B6-CC1	5	3.39228	0.256118	10	2.54318	0.360728	2.55698	90	<.001
Nest quality	P1-21	B6-CC44	B6-CC1	5	3.21782	0.179574	10	2.54318	0.360728	2.13329	90	0.021
Nest quality	P1-21	B6-CC57	B6-CC1	6	3.25817	0.230686	10	2.54318	0.360728	2.23151	90	0.019
Out of nest	P1-21	B6-CC10	B6-B6	8	4.00778	2.09784	12	1.26649	1.90698	1.38213	99	0.002
PC 1	P1-21	B6-CC1	B6-CC2	12	0.823094	1.04369	6	-0.0527	0.266555	0.997358	99	0.016
PC 1	P1-21	B6-CC1	B6-CC32	12	0.823094	1.04369	8	-0.005925	0.423148	0.966788	99	0.002
Total nursing	P1-21	B6-CC12	B6-B6	12	10.1469	0.719167	12	8.85918	1.34106	1.19675	99	0.003
Total nursing	P1-21	B6-CC12	B6-CC24	12	10.1469	0.719167	7	8.85346	1.125	1.46327	99	0.046
Total nursing	P1-21	B6-CC12	B6-CC25	12	10.1469	0.719167	5	8.44702	0.467997	2.56943	99	0.025
Total nursing	P1-21	B6-CC12	B6-CC75	12	10.1469	0.719167	7	9.05589	0.972132	1.33468	99	0.029
Nest quality	PNW 1	B6-CC22	B6-CC10	6	3.67833	0.242109	2	3.095	0.0494974	2.62837	96	0.05
Nest quality	PNW 1	B6-CC7	B6-CC10	10	3.937	0.461014	2	3.095	0.0494974	1.92397	96	0.016
Eating	PNW 2	B6-CC1	B6-CC12	11	2.4345	2.21865	12	0.9433	0.89152	0.897543	105	0.006
Eating	PNW 2	B6-CC28	B6-CC12	6	2.7867	1.06755	12	0.9433	0.89152	1.94034	105	0.007
Nest quality	PNW 2	B6-CC16	B6-CC1	5	3.424	0.17199	8	2.725	0.5106	1.66304	87	0.022
Nest quality	PNW 2	B6-CC22	B6-CC1	6	3.4283	0.16916	8	2.725	0.5106	1.73665	87	0.002
Nest quality	PNW 2	B6-CC44	B6-CC1	5	3.374	0.20948	8	2.725	0.5106	1.52184	87	0.031
Nest quality	PNW 2	B6-CC13	B6-CC10	6	3.333	0.40702	4	2.5875	0.73205	1.35099	87	0.044
Nest quality	PNW 2	B6-CC16	B6-CC10	5	3.424	0.17199	4	2.5875	0.73205	1.68458	87	0.005
Nest quality	PNW 2	B6-CC22	B6-CC10	6	3.4283	0.16916	4	2.5875	0.73205	1.79731	87	<.001
Nest quality	PNW 2	B6-CC24	B6-CC10	7	3.2614	0.32493	4	2.5875	0.73205	1.35045	87	0.023
Nest quality	PNW 2	B6-CC44	B6-CC10	5	3.374	0.20948	4	2.5875	0.73205	1.55828	87	0.007
Nest quality	PNW 2	B6-CC57	B6-CC10	6	3.3633	0.17739	4	2.5875	0.73205	1.65165	87	0.015
Nest quality	PNW 2	B6-CC75	B6-CC10	7	3.4229	0.19788	4	2.5875	0.73205	1.84628	87	0.034
Out of nest	PNW 2	B6-CC10	B6-B6	11	4.3364	1.88376	15	1.43	1.89938	1.53543	105	0.018
Out of nest	PNW 2	B6-CC12	B6-B6	12	4.9708	2.92	15	1.43	1.89938	1.47381	105	<.001
Out of nest	PNW 2	B6-CC28	B6-B6	6	4.4867	2.04697	15	1.43	1.89938	1.57618	105	0.045
Total nursing	PNW 2	B6-CC12	B6-CC28	12	10.1208	0.90378	6	7.8617	1.5501	1.97195	105	0.027
Nest build	PNW 3	B6-CC22	B6-B6	4	0.44	0.13342	14	0.0607	0.10034	3.53422	104	0.006
Nest build	PNW 3	B6-CC22	B6-CC10	4	0.44	0.13342	10	0.053	0.11586	3.21188	104	0.021
Nest build	PNW 3	B6-CC22	B6-CC13	4	0.44	0.13342	7	0.0886	0.11291	2.92501	104	0.025
Nest build	PNW 3	B6-CC22	B6-CC24	4	0.44	0.13342	7	0.0286	0.07559	4.16794	104	0.013
Nest build	PNW 3	B6-CC22	B6-CC28	4	0.44	0.13342	6	0.0333	0.08165	3.90588	104	0.011
Nest quality	PNW 3	B6-CC13	B6-B6	7	2.5543	0.70223	13	1.5946	0.62138	1.47771	92	0.034
Nest quality	PNW 3	B6-CC22	B6-B6	4	2.7025	0.467	13	1.5946	0.62138	1.86602	92	0.001
Nest quality	PNW 3	B6-CC44	B6-B6	5	2.316	0.44207	13	1.5946	0.62138	1.24004	92	0.04
Nest quality	PNW 3	B6-CC57	B6-B6	6	2.6183	0.42832	13	1.5946	0.62138	1.79154	92	<.001
Nest quality	PNW 3	B6-CC12	B6-CC1	9	1.8533	0.78069	11	1.2818	0.66343	0.796056	92	0.047
Nest quality	PNW 3	B6-CC13	B6-CC1	7	2.5543	0.70223	11	1.2818	0.66343	1.87618	92	<.001
Nest quality	PNW 3	B6-CC22	B6-CC1	4	2.7025	0.467	11	1.2818	0.66343	2.27816	92	<.001
Nest quality	PNW 3	B6-CC24	B6-CC1	7	2.1843	0.64171	11	1.2818	0.66343	1.37709	92	0.001
Nest quality	PNW 3	B6-CC25	B6-CC1	5	1.962	0.33499	11	1.2818	0.66343	1.15563	92	0.049
Nest quality	PNW 3	B6-CC32	B6-CC1	8	2.1338	0.60646	11	1.2818	0.66343	1.33003	92	0.002
Nest quality	PNW 3	B6-CC44	B6-CC1	5	2.316	0.44207	11	1.2818	0.66343	1.69971	92	<.001
Nest quality	PNW 3	B6-CC57	B6-CC1	6	2.6183	0.42832	11	1.2818	0.66343	2.24446	92	<.001
Nest quality	PNW 3	B6-CC7	B6-CC1	5	2.266	0.29288	11	1.2818	0.66343	1.69064	92	0.01
Nest quality	PNW 3	B6-CC75	B6-CC1	7	2.4686	0.60905	11	1.2818	0.66343	1.84407	92	0.002
Nest quality	PNW 3	B6-CC13	B6-CC10	7	2.5543	0.70223	5	1.31	0.80654	1.66862	92	0.011
Nest quality	PNW 3	B6-CC22	B6-CC10	4	2.7025	0.467	5	1.31	0.80654	2.04166	92	<.001
Nest quality	PNW 3	B6-CC24	B6-CC10	7	2.1843	0.64171	5	1.31	0.80654	1.22755	92	0.046
Nest quality	PNW 3	B6-CC44	B6-CC10	5	2.316	0.44207	5	1.31	0.80654	1.54684	92	0.011
Nest quality	PNW 3	B6-CC57	B6-CC10	6	2.6183	0.42832	5	1.31	0.80654	2.09218	92	<.001
Nest quality	PNW 3	B6-CC75	B6-CC10	7	2.4686	0.60905	5	1.31	0.80654	1.66749	92	0.045
Total nurse	PNW 3	B6-CC1	B6-CC25	14	9.7071	1.3852	5	6.606	0.91689	2.40322	104	0.004
Total nurse	PNW 3	B6-CC12	B6-CC25	12	9.6	1.31357	5	6.606	0.91689	2.45317	104	0.006
