# Supplementary material for: Offspring genetic diversity regulates rearing experiences that predict differential susceptibility to Chd8 haploinsufficiency
Source: Research Square preprint supplement (doi:10.21203/rs.3.rs-6058389/v1), 2025-03-03
Supplement: Supplementary file 3 [file bfb2eb0e0638f51df905eaa0.xlsx]

## Sheet: Cohen's D by LO corr
		Spearman's correlation coefficients for litter observation variables and Cohen's D strain effect sizes for postweaning trait disruptions
			Litter variables					Dam behaviors									Pup behaviors
		Trait effect sizes	Litter size	% Males	% Chd8 Hets	Nest quality	Total nurse	Passive nurse	Active nurse	L/G	Nest build	Out of nest	Eat	Rest	Run	Autogroom	L/G	Crawl/run	Nest build	Jump	Climb	Dig	Eyes open	Eat solid
	Males	Weaning body weight	0.055	0.426	-0.115	-0.016	0.13	0.006	0.275	0.122	0.367	0.773	-0.265	-0.134	0.322	0.049	-0.03	-0.369	-0.15	-0.284	-0.03	0.078	-0.2	-0.29
		Adolescent body weight	-0.393	0.003	-0.366	0.097	0.03	-0.003	-0.074	-0.027	-0.01	0.256	-0.528	0.013	-0.055	0.232	0.054	-0.099	0.334	0.085	0.033	0.11	0.24	0.015
		Adult body weight	-0.116	-0.344	-0.259	0.184	-0.093	0.06	-0.476	-0.168	0.022	0.125	-0.293	0.143	-0.393	0.312	0.071	0.001	0.366	0.247	-0.062	0.152	0.353	0.071
		Terminal body weight	-0.08	-0.221	-0.124	0.132	-0.024	-0.001	-0.353	-0.165	0.174	0.062	-0.408	0.135	-0.262	0.203	-0.093	0.001	0.314	0.187	-0.032	0.192	0.253	0.001
		Brain weight	-0.034	0.165	-0.156	-0.187	0.025	-0.066	0.11	0.099	0.24	0.216	-0.031	-0.205	0.163	-0.247	-0.24	-0.218	-0.154	-0.393	-0.046	-0.158	-0.274	-0.325
		DOF distance	0.277	-0.021	-0.044	-0.018	-0.162	-0.072	-0.109	0.202	0.078	0.153	0.296	-0.122	0.003	-0.222	-0.211	-0.244	-0.557	-0.293	-0.341	-0.335	-0.221	-0.295
		DSI aggression	0.298	0.094	-0.112	0.156	-0.549	-0.377	-0.449	-0.043	0.536	0.296	-0.035	-0.271	0.018	0.202	0.145	-0.049	0.163	0.044	0.264	0.364	0.159	0.016
		DSI sniffing	-0.035	0.012	-0.112	0.082	-0.23	-0.205	-0.324	0.049	0.306	-0.191	-0.368	-0.163	-0.089	-0.102	-0.102	-0.589	-0.184	-0.165	-0.167	-0.358	-0.162	-0.389
		BOF % center distance	-0.136	-0.335	-0.106	-0.087	-0.032	0.024	-0.082	-0.055	-0.381	-0.214	0.386	0.093	-0.222	0.125	0.099	0.646	0.317	0.338	0.019	0.239	0.326	0.455
		Fear acquisition	0.422	-0.382	0.044	-0.212	-0.11	0.331	-0.312	-0.441	-0.127	0.191	0.402	0.206	0.222	-0.049	-0.113	-0.035	-0.358	-0.522	-0.304	-0.224	-0.088	-0.214
		Fear expression	0.016	-0.244	0.297	-0.215	-0.246	0.046	-0.212	-0.323	-0.056	0.043	0.019	-0.141	0.321	-0.274	-0.299	-0.163	-0.339	-0.431	-0.347	-0.383	-0.206	-0.309
		Fear extinction	0.041	-0.056	0.006	0.054	-0.128	0.068	-0.138	0.057	-0.228	-0.053	0.103	-0.075	-0.18	-0.159	0.034	-0.336	-0.423	-0.359	-0.408	-0.243	-0.062	-0.105
	Females	Weaning body weight	0.385	-0.362	0.288	0.022	0.665	0.716	0.031	-0.357	-0.211	-0.124	-0.1	0.797	-0.234	-0.034	-0.27	-0.025	-0.16	-0.122	-0.214	-0.136	-0.029	-0.13
		Adolescent body weight	0.062	-0.141	0.05	0.745	-0.013	-0.01	-0.159	0.367	0.115	-0.029	0.031	-0.006	-0.547	0.074	0.261	-0.227	0.015	0.377	0.254	-0.041	0.206	0.124
		Adult body weight	-0.186	-0.244	-0.418	0.587	-0.141	-0.019	-0.349	0.134	-0.119	-0.128	-0.141	0.08	-0.558	0.297	0.449	-0.094	0.303	0.375	0.279	0.109	0.426	0.314
		Terminal body weight	-0.106	-0.379	-0.132	0.456	0.212	0.224	-0.124	0.094	-0.259	-0.439	-0.184	0.364	-0.534	-0.018	0.119	-0.075	0.067	0.234	0.09	-0.178	0.285	0.218
		Brain weight	0.075	-0.179	0.009	-0.343	0.355	0.423	0.007	-0.554	0.028	0.174	-0.374	0.471	0.311	0.177	-0.12	-0.012	0.203	-0.178	-0.118	-0.003	0.009	-0.149
		DOF distance	0.339	0.179	0.615	0.075	0.243	0.156	0.386	0.162	0.001	0.06	0.241	0.052	0.083	-0.338	-0.288	0.171	-0.278	-0.218	0.08	0.087	-0.088	0.004
		DSI aggression	0.479	0.74	0.209	0.049	0.093	-0.179	0.278	0.378	0.532	0.372	0.021	-0.197	-0.129	-0.067	0	-0.293	-0.242	-0.167	0.061	0.428	-0.284	-0.16
		DSI sniffing	0.197	0.438	0.229	0.306	0.025	-0.032	0.305	0.354	-0.071	0.134	0.278	-0.158	-0.053	-0.113	0.08	-0.04	-0.275	-0.078	0.278	0.153	-0.132	0.028
		BOF % center distance	0.394	-0.074	0.185	-0.6	0.029	0.253	-0.103	-0.295	-0.292	-0.197	0.122	0.293	-0.072	-0.21	-0.319	0.256	-0.052	-0.299	-0.191	-0.057	-0.05	-0.068
		Fear acquisition	0.735	0.182	0.147	-0.172	-0.024	0.186	-0.056	0.077	0.208	0.328	0.14	0.186	-0.139	0.015	0.093	-0.074	0.004	-0.271	0.058	0.155	0.185	0.001
		Fear expression	0.256	0.318	-0.279	-0.043	-0.552	-0.479	-0.209	0.326	0.424	0.393	0.144	-0.352	0.062	0.396	0.366	0.194	0.465	0.286	0.374	0.417	0.432	0.225
		Fear extinction	-0.069	0.012	-0.503	-0.177	-0.54	-0.29	-0.386	-0.124	-0.053	0.099	0.353	-0.299	0.274	0.359	0.322	-0.119	-0.065	0.132	-0.019	-0.212	-0.212	-0.19
