# Supplementary material for: Offspring genetic diversity regulates rearing experiences that predict differential susceptibility to Chd8 haploinsufficiency
Source: Research Square preprint supplement (doi:10.21203/rs.3.rs-6058389/v1), 2025-03-03
Supplement: Supplementary file 4 [file c3aef7a29c5bfbd13aaa8d59.xlsx]

## Sheet: predictors
Predictor	Dependent Variable	Sex	Chd8 genotype	R^2	DF	F	P
Dam lick/groom	Weaning body weight	Males	Het	0.042	106	4.566	<.05
Dam lick/groom	Adult body weight	Males	Het	0.056	106	6.221	<.05
Dam lick/groom	Terminal body weight	Males	Het	0.056	104	6.162	<.05
Dam lick/groom	Brain weight	Males	Het	0.04	105	4.287	<.05
Dam lick/groom	Weaning body weight	Females	Het	0.079	108	9.126	<.01
Dam lick/groom	Adult body weight	Females	Het	0.055	108	6.281	<.05
Dam lick/groom	Terminal body weight	Females	Het	0.037	106	3.996	<.05
Dam lick/groom	Brain weight	Females	Het	0.06	108	6.888	<.05
Dam active nursing	Weaning body weight	Females	Het	0.078	108	9.027	<.01
Dam active nursing	Adult body weight	Females	Het	0.07	108	8.09	<.01
Percent male littermates	Terminal body weights	Males	Het	0.064	104	7.984	<.01
Percent male littermates	Terminal body weights	Females	Het	0.044	106	4.879	<.05
Percent Chd8+/- siblings	DSI sniffing duration	Females	Het	0.08	108	9.438	<.01
Percent Chd8+/- siblings	BOF % center distance traveled	Males	WT	0.063	107	7.173	<.01
Dam out of nest	DOF distance traveled	Females	Het	0.137	108	17.042	<.001
Dam out of nest	DSI aggression duration	Females	Het	0.042	108	4.723	<.05
Pup autogrooming	Brain weight	Females	Het	0.07	108	8.079	<.01
Pup autogrooming	DOF distance traveled	Females	Het	0.105	108	12.533	<.001
Pup crawl/run	Brain weight	Males	Het	0.042	105	4.562	<.05
